# Supplementary material
Source: publisher figshare collection journal article supplement (https://karger.figshare.com/ndownloader/files/26600615)
Supplement: Supplementary file 1 [file 26600615]

**Appendix. Cognitive Tests in the Longitudinal Aging Study in The Diagnostic Assessment of Dementia for the Longitudinal Aging Study in India (LASI-DAD)**

| **Test** | **Cognitive domain** |
| --- | --- |
| HMSE: Orientation to time | Orientation |
| HMSE: Orientation to place | Orientation |
| TICS: Naming Prime Minister | Orientation |
| HMSE: 3-word recall: immediate and delayed | Memory |
| CERAD 10-word recall: immediate, delayed, and recognition | Memory |
| Logical memory: immediate, delayed, and recognition | Memory |
| Constructional praxis: delayed* | Memory |
| Verbal fluency: Animal naming | Language/fluency |
| HMSE: Writing or saying sentence* | Language/fluency |
| HMSE: Phrase repetition | Language/fluency |
| HMSE: Naming common objects by sight* | Language/fluency |
| HMSE: Following a read/acted command* | Language/fluency |
| HMSE: 3-stage task | Language/fluency |
| TICS: Naming common objects by description | Language/fluency |
| Community Screening Instrument for Dementia (CSI-D)+ | Language/fluency |
| Raven’s Progressive Matrices* | Executive function |
| Clock Drawing* | Executive function |
| Go-No-Go Test | Executive function |
| Serial 7’s | Executive function |
| HMSE: Backwards day naming | Executive function |
| Symbol cancelation* | Executive function |
| Digit span backward and forward | Executive function |
| Constructional praxis: immediate* | Visuospatial |
| HMSE: Draw assigned picture* | Visuospatial |

CERAD: Consortium to Establish a Registry for Alzheimer’s Disease; CSI-D: Community Screening Instrument for Dementia; HMSE: Hindi Mental State Exam; TICS: Telephone Interview for Cognitive Status

*vision-dependent tests

+only the naming common objects test from CSI-D was treated as a vision-dependent test
